# Supplementary material for: Lessons learned from implementing evidence-based health information in Primary Care in Austria: A process evaluation using RE-AIM QuEST
Source: Research Square preprint supplement (doi:10.21203/rs.3.rs-7639243/v1), 2025-10-28
Supplement: Supplementary file 1 [file 0cada670f81574707cdd7f99.docx]

Data overview

# Survey 1 (Pilot project)

Conducted between August 2019 and March 2021.

EVI settings received an invitation to participate in the online survey 2-4 months after receiving the EVI materials.

**Focus**: The main focus of the survey was the assessment of health professionals’ perspective of the EVI Box and the health information brochures as well as their experiences using the EVI Box in everyday practice.

**Topics of the survey**:

- use of EVI-Box & health information
- suggestions for improvement
- evidence-based health information material topics
- use of EVI-Website
- participation in EVI-Workshop
- sociodemographic data

**Participation**: The survey was distributed to 82***** out of 105 EVI settings (general practices and primary care centres). 34 participants completed the survey.

***Note**: To meet the submission deadline for the final report to the funding organization, Survey 1 had to be completed and analysed before the project officially ended. Settings that were recruited during the final month of the project were not included in the final evaluation survey, as they had insufficient time to gain experience with the EVI materials.

Table 1: Sociodemographic characteristics (Survey 1).

|  |  | **N** =34 | | | | | |  | |
| --- | --- | --- | --- | --- | --- | --- | --- | --- | --- |
|  |  | **n** | | | | | **(%)** |  | |
| **Sex** | Male | 18 | | | | | (53.0) |  | |
|  | Female | 16 | | | | (47.0) | |  | |
| **Occupation** | General practitioner | 29 | | | (85.0) | | |  | |
|  | Medical assistant | 2 | | (6.0) | | | |  | |
|  | Physiotherapist | 1 | | (3.0) | | | |  | |
|  | Other  (nurse, no answer) | 2 | (6.0) | | | | |  | |
| **Workplace*** | Single practice | 23 |  | | | | |  | |
|  | Group practice | 10 |  | | | | |  | |
|  | Primary care centre | 3 |  | | | | |  | |
| **Work area** | Community over 100.000 inhabitants | 10 | (29.0) | | | | |  | |
|  | Community between 10.000 and 100.000 inhabitants | 3 | (9.0) | | | | |  | |
|  | Community under 10.000 inhabitants | 21 | (62.0) | | | | |  | |
|  |  | **min-max** | | | | | | **M** | **(SD)** |
| **Age** |  | 27 - 67 | | | | | | 47.6 | (9.6) |
| **Employment duration** |  | 0.5 - 43 | | | | | | 20.3 | (10.6) |

* *The variable “workplace“ was a multiple-choice question, because healthcare professionals can work in different health institutions. Therefore, percentages are not specified.*

# Focus groups / user reviews (pilot project)

Four focus groups—comprising diverse patient demographics, including women, men, individuals aged 65 and over, and migrants—assessed the attractiveness, acceptance, clarity, and perceived trustworthiness of the evidence-based health information (EBHI) materials used within EVI.

Table 2: Characteristics of the focus groups

| **Focus group** | **1** | **2** | **3** | **4** |
| --- | --- | --- | --- | --- |
| **Participants** | Elderly | Men | Women | People with a migration background |
| **Number of participants** | 4 | 4 | 9 | 6 |
| **Date** | October 2019 | October 2019 | October 2019 | October 2019 |
| **Place** | Rural; < 10.000 inhabitants | Urban;  > 100.000 inhabitants | Urban;  > 100.000 inhabitants | Urban; >100.000 inhabitants |

|  |  | **N** = 23 | | | | | |
| --- | --- | --- | --- | --- | --- | --- | --- |
|  |  | **n** | | | | **(%)** | |
| **Sex** | Male | 8 | | | | | (34.8) |
|  | Female | 15 | | | | (65.2) | |
|  |  | **M** | | | | **(SD)** | |
| **Age** |  | 54.2 | | | (19.4) | | |
|  |  | **n** | | | | **(%)** | |
| **Age groups** | ≤ 29 years | 4 | | (17.4) | | | |
|  | 30-39 years | 4 | (17.4) | | | | |
|  | 40-49 years | 2 | (8.7) | | | | |
|  | 50-59 years | 2 | (8.7) | | | | |
|  | 60-69 years | 6 | (26.1) | | | | |
|  | 70- 79 years | 3 | (13.0) | | | | |
|  | ≥ 80 years | 2 | (8.7) | | | | |
| **Highest education** | Compulsory Education | 3 | (13.0) | | | | |
|  | Vocational Education and Apprenticeship | 5 | (21.7) | | | | |
|  | Upper Secondary Education | 6 | (26.1) | | | | |
|  | Tertiary Education | 9 | (39.1) | | | | |

Table 3: Sociodemographic characteristics of participants across the four focus groups

# Survey 2 (follow-up project)

Conducted between March 2024 and September 2024.

Newly recruited EVI settings received an invitation to participate in the online survey 6-8 weeks after receiving EVI materials.

**Focus**: The main focus of the survey was the assessment of health professionals’ perspective of the EVI Box, the health information brochures, the website as well as their experiences using the EVI Box in everyday practice.

**Topics of the survey**:

- reasons for participation
- personal delivery of evidence-based health information materials
- use of EVI-Box and evidence-based health information materials
- use of EVI- Website
- sociodemographic data

**Participation**: The survey was distributed to newly recruited EVI settings as part of the follow-up project. Of the 92 total settings, 68 were primary care settings. Evaluation Survey 2 was sent to 44 of these. Settings that were recruited too close to the end of the project, did not participate in Survey 2. Instead, they were only invited to participate in the final evaluation survey (Survey 3).

Table 4: Sociodemographic Characteristics (Survey 2)

|  |  | **N** = 31 | |
| --- | --- | --- | --- |
|  |  | **n** | **(%)** |
| **Sex** | Male | 8 | (25.8) |
|  | Female | 23 | (74.2) |
| **Age groups** | ≤ 29 years | 1 | (3.2) |
|  | 30-39 years | 11 | (35.5) |
|  | 40-49 years | 9 | (29.0) |
|  | 50-59 years | 6 | (19.4) |
|  | 60-69 years | 4 | (12.9) |
| **Occupation** | General practitioner | 18 | (58.1) |
|  | Paediatrician | 1 | (3.2) |
|  | Primary care manager | 2 | (6.5) |
|  | Medical assistant | 3 | (9.7) |
|  | Municipal employee | 1 | (3.2) |
|  | Community nurse | 5 | (16.1) |
|  | Other (chairwoman of a social institution) | 1 | (3.2) |
| **Work place** | General medicine practice | 20 | (64.5) |
|  | Paediatric practice | 1 | (3.2) |
|  | Primary care centre | 3 | (9.7) |
|  | Community | 7 | (22.6) |

# Focus groups / doctors’ reviews (follow-up project)

Two focus groups—comprising General Practitioners and Paediatricians—assessed use of EVI-materials, introduction of the EVI-Website and recruitment strategies.

| **Focus group** | **1** | **2** |
| --- | --- | --- |
| **Participants** | General Practitioners | Paediatricians |
| **Number of participants** | 2 | 2 |
| **Male participants** | 2 | 1 |
| **Female participants** | 0 | 1 |
| **Date** | July 2023 | July 2023 |

# Survey 3 (follow-up project)

Conducted between November 2024 and March 2025.

All active EVI settings from the pilot and follow-up project.

**Focus**: The main focus of the survey was the assessment of health professionals’ perspective of the use of the health information brochures, the trust in evidence-based health information materials, changes in everyday working life and suggestions for future development of the project.

**Topics of the survey**:

- us of evidence-based health information materials
- trust in evidence-based health information materials
- changes in everyday working life due to evidence-based health information materials
- suggestions for improvement
- sociodemographic data

**Participation**: The survey was distributed to all 150 EVI settings that were active by the end of the follow-up phase in the end of 2024. Of these 67 (45%) completed Survey 3.

Table 5: Sociodemographic characteristics (Survey 3).

|  |  | **N** = 67 | |
| --- | --- | --- | --- |
|  |  | **n** | **(%)** |
| **Sex** | Male | 26 | (38.8) |
|  | Female | 41 | (61.2) |
| **Age groups** | ≤ 29 years | 2 | (2.9) |
|  | 30-39 years | 15 | (22.4) |
|  | 40-49 years | 19 | (28.4) |
|  | 50-59 years | 16 | (23.8) |
|  | 60-69 years | 14 | (20.9) |
|  | ≥ 70 Jahre | 1 | (1.5) |
| **Occupation** | General practitioner | 47 | (70.2) |
|  | Paediatrician | 5 | (7.5) |
|  | Primary care manager | 1 | (1.5) |
|  | Nurse | 4 | (5.9) |
|  | Medical assistant | 2 | (2.9) |
|  | Social worker | 1 | (1.5) |
|  | Community nurse | 7 | (10.5) |
| **Work place** | General medicine practice | 44 | (65.7) |
|  | Paediatric practice | 5 | (7.5) |
|  | Primary care centre | 10 | (14.9) |
|  | Community | 6 | (8.9) |
|  | Other | 1 | (1.5) |
|  | No answer | 1 | (1.5) |

# EVI-Website data (follow-up project)

Data between January 2024 and July 2025 was extracted by Cabin Analytics.

**Analysed metrics:**

- Page hit: is a web metric referring to a single request made to a web server for any file
- Unique visitor: is a web metric referring to the number of distinct individuals who access a website during a specified time period. Each visitor is only counted once, regardless of how many times they return to the website.

Figure 1: Number of page hits and unique visitors for every month beginning January 2024 until July 2025. The red line indicates the end of the funding period for the EVI-project.
